# Supplementary material for: High-Impact Risk Factors for Mycobacterium avium ssp. paratuberculosis in Dairy Herds in Germany
Source: MDPI journal article supplement (doi:10.3390/ani13121889), 2023-06-06
Supplement: s1 [file s1]

*Supplementary Material*

# **High-Impact Risk Factors for *Mycobacterium avium* ssp. *paratuberculosis* in Dairy Herds in Germany**

Mette Krieger \*, Susanne Eisenberg, Karsten Donat and Amely Campe

\* **Correspondence:** Mette.Krieger@tiho-hannover.de

**1     Supplementary Tables**

Supplementary Table S1: Descriptive and single-factorial analyses of collected categorical variables considered to be risk factors for MAP-positive dairy herds (*Mycobacterium avium* ssp. *paratuberculosis* had been isolated from at least one environmental sample)

| Variable                                       | Category                                   | MAP-<br>positive<br>herds<br>n (%)             | MAP-<br>negative<br>herds<br>n (%)               | Herds with<br>information<br>available<br>n (%)    | OR                                                              | LCL                | UCL                | p                                            | AFe                 | AFp                 |
|------------------------------------------------|--------------------------------------------|------------------------------------------------|--------------------------------------------------|----------------------------------------------------|-----------------------------------------------------------------|--------------------|--------------------|----------------------------------------------|---------------------|---------------------|
| Herd characteristics                           |                                            |                                                |                                                  |                                                    |                                                                 |                    |                    |                                              |                     |                     |
| Breed                                          | 80% Holstein                               | N: 18 (81.82)<br>E: 56 (81.16)<br>S: 0 (0.0)   | N: 138 (85.71)<br>E: 71 (70.30)<br>S: 1 (0.99)   | N: 183 (100)<br>E: 170 (100)<br>S: 104 (100)       | N, E: No logistic regression conducted due to missing variation |                    |                    |                                              |                     |                     |
|                                                | 80% Simmental cattle                       | N: 0 (0.0)<br>E: 1 (1.45)<br>S: 2 (66.67)      | N: 0 (0.0)<br>E: 1 (0.99)<br>S: 82 (81.19)       |                                                    |                                                                 |                    |                    |                                              | N: n.p.<br>E: 0.12  | N: 0.00<br>E: 0.00  |
|                                                | 80% Other                                  | N: 4 (18.18)<br>E: 12 (17.39)<br>S: 1 (33.33)  | N: 23 (14.29)<br>E: 29 (28.71)<br>S: 18 (17.82)  |                                                    |                                                                 |                    |                    |                                              | N: 0.22<br>E: -0.51 | N: 0.04<br>E: -0.09 |
|                                                |                                            |                                                |                                                  |                                                    |                                                                 |                    |                    |                                              |                     |                     |
| Housing                                        | Tiestall                                   | N: 0 (0.0)<br>E: 0 (0.0)<br>S: 0 (0.0)         | N: 7 (4.35)<br>E: 3 (2.97)<br>S: 33 (32.67)      | N: 161 (87.98)<br>E: 132 (77.65)<br>S: 101 (97.12) | N, E: No logistic regression possible due to missing variation  |                    |                    |                                              |                     |                     |
|                                                | Freestall                                  | N: 21 (95.45)<br>E: 56 (81.16)<br>S: 3 (100)   | N: 133 (82.61)<br>E: 73 (72.28)<br>S: 65 (64.36) |                                                    |                                                                 |                    |                    |                                              | N: 1.00<br>E: 1.00  | N: 1.00<br>E: 1.00  |
| General farm management: External biosecurity  |                                            |                                                |                                                  |                                                    |                                                                 |                    |                    |                                              |                     |                     |
| Did you purchase cattle in the last 12 months? | No <sup>1</sup>                            | N: 12 (54.55)<br>E: 32 (46.38)<br>S: 2 (66.67) | N: 90 (55.90)<br>E: 68 (67.33)<br>S: 75 (74.26)  | N: 182 (99.45)<br>E: 170 (100)<br>S: 104 (100)     |                                                                 |                    |                    | N: 0.34 <sup>a</sup><br>E: 0.01 <sup>a</sup> |                     |                     |
|                                                | Yes with inquiring about the MAP status    | N: 5 (22.73)<br>E: 6 (8.70)<br>S: 0 (0.0)      | N: 19 (11.80)<br>E: 10 (9.90)<br>S: 2 (1.98)     |                                                    | N: 1.97<br>E:1.28                                               | N: 0.62<br>E: 0.43 | N: 6.26<br>E: 3.81 | N: 0.15<br>E: 0.60                           | N: 0.44<br>E: 0.15  | N: 0.13<br>E: 0.22  |
|                                                | Yes without inquiring about the MAP status | N: 5 (22.73)<br>E: 31 (44.93)<br>S: 1 (33.33)  | N: 51 (31.68)<br>E: 23 (22.77)<br>S: 24 (23.76)  |                                                    | N: 0.74<br>E: 2.86                                              | N: 0.25<br>E: 1.45 | N: 2.21<br>E: 5.67 | N: 0.24<br>E: 0.02                           | N: -0.32<br>E: 0.44 | N: -0.09<br>E: 0.02 |

| Variable                                                                                                                              | Category         | MAP-<br>positive<br>herds<br>n (%)             | MAP-<br>negative<br>herds<br>n (%)               | Herds with<br>information<br>available<br>n (%)    | OR                 | LCL                | UCL                | p                  | AFe                  | AFp                  |
|---------------------------------------------------------------------------------------------------------------------------------------|------------------|------------------------------------------------|--------------------------------------------------|----------------------------------------------------|--------------------|--------------------|--------------------|--------------------|----------------------|----------------------|
| Is cattle that has left the herd reintegrated directly into the herd?                                                                 | No <sup>1</sup>  | N: 1 (4.55)<br>E: 7 (10.14)<br>S: 1 (33.33)    | N: 8 (4.97)<br>E: 9 (8.91)<br>S: 23 (22.77)      | N: 47 (25.68)<br>E: 57 (33.53)<br>S: 45 (43.27)    |                    |                    |                    |                    |                      |                      |
|                                                                                                                                       | Yes              | N: 4 (18.18)<br>E: 21 (30.43)<br>S: 0 (0.0)    | N: 34 (21.12)<br>E: 20 (19.80)<br>S: 21 (20.79)  |                                                    | N: 0.94<br>E: 1.35 | N: 0.09<br>E: 0.42 | N: 9.6<br>E: 4.32  | N: 0.96<br>E: 0.61 | N: -0.06<br>E: 0.15  | N: -0.04<br>E: 0.11  |
|                                                                                                                                       |                  |                                                |                                                  |                                                    |                    |                    |                    |                    |                      |                      |
| Do you share equipment or vehicles that is used in livestock farming with other farms (e.g., cattle trucks, hoof trimming chutes...)? | No <sup>1</sup>  | N: 20 (90.91)<br>E: 66 (95.65)<br>S: 2 (66.67) | N: 128 (79.50)<br>E: 89 (88.12)<br>S: 70 (69.31) | N: 182 (99.45)<br>E: 170 (100)<br>S: 103 (99.04)   |                    |                    |                    |                    |                      |                      |
|                                                                                                                                       | Yes              | N: 2 (9.09)<br>E: 3 (4.35)<br>S: 1 (33.33)     | N: 32 (19.88)<br>E: 12 (11.88)<br>S: 30 (29.70)  |                                                    | N: 0.4<br>E: 0.34  | N: 0.09<br>E: 0.09 | N: 1.8<br>E: 1.24  | N: 0.23<br>E: 0.1  | N: -1.30<br>E: -1.13 | N: -0.12<br>E: -0.05 |
|                                                                                                                                       |                  |                                                |                                                  |                                                    |                    |                    |                    |                    |                      |                      |
| Are you keeping young cattle* <sup>1</sup> on pasture?                                                                                | No <sup>1</sup>  | N: 6 (27.27)<br>E: 39 (56.52)<br>S: 3 (100)    | N: 49 (30.43)<br>E: 53 (52.48)<br>S: 58 (57.43)  | N: 183 (100)<br>E: 170 (100)<br>S: 104 (100)       |                    |                    |                    |                    |                      |                      |
|                                                                                                                                       | Yes              | N: 16 (72.73)<br>E: 30 (43.48)<br>S: 0 (0.0)   | N: 112 (69.57)<br>E: 48 (47.52)<br>S: 43 (42.57) |                                                    | N: 1.17<br>E: 0.8  | N: 0.43<br>E: 0.43 | N: 3.16<br>E: 1.48 | N: 0.76<br>E: 0.48 | N: 0.13<br>E: -0.10  | N: 0.09<br>E: -0.04  |
|                                                                                                                                       |                  |                                                |                                                  |                                                    |                    |                    |                    |                    |                      |                      |
| Is it possible to clean boots and hands before leaving each location of the farm?                                                     | No               | N: 9 (40.91)<br>E: 5 (7.25)<br>S: 0 (0.0)      | N: 46 (28.57)<br>E: 8 (7.92)<br>S: 17 (16.83)    | N: 172 (93.99)<br>E: 168 (98.82)<br>S: 103 (99.04) |                    |                    |                    |                    |                      |                      |
|                                                                                                                                       | Yes <sup>1</sup> | N: 12 (54.55)<br>E: 63 (91.30)<br>S: 3 (100)   | N: 105 (65.22)<br>E: 92 (91.09)<br>S: 83 (82.18) |                                                    | N: 1.71<br>E: 0.91 | N: 0.68<br>E: 0.29 | N: 4.34<br>E: 2.92 | N: 0.26<br>E: 0.88 | N: 0.37<br>E: -0.06  | N: 0.16<br>E: 0.00   |
|                                                                                                                                       |                  |                                                |                                                  |                                                    |                    |                    |                    |                    |                      |                      |
| What kind of livestock farming (besides dairy cow farming) is here on                                                                 | No <sup>1</sup>  | N: 19 (86.36)<br>E: 44 (63.77)<br>S: 3 (100)   | N: 113 (70.19)<br>E: 62 (61.39)<br>S: 79 (78.22) | N: 183 (100)<br>E: 170 (100)<br>S: 104 (100)       |                    |                    |                    |                    |                      |                      |
|                                                                                                                                       | Yes              | N: 3 (13.64)                                   | N: 48 (29.81)                                    |                                                    | N: 0.37            | N: 0.11            | N: 1.32            | N: 0.13            | N: -1.45             | N: -0.20             |

| Variable                                                                                                              | Category                                                    | MAP-<br>positive<br>herds<br>n (%)         | MAP-<br>negative<br>herds<br>n (%)          | Herds with<br>information<br>available<br>n (%) | OR                                                                | LCL                | UCL                | p                    | AFe                | AFp                 |
|-----------------------------------------------------------------------------------------------------------------------|-------------------------------------------------------------|--------------------------------------------|---------------------------------------------|-------------------------------------------------|-------------------------------------------------------------------|--------------------|--------------------|----------------------|--------------------|---------------------|
| the farm?: Game<br>animals, goats/sheep,<br>pigs, horses<br>(breeding, fattening,<br>pension), poultry,<br>water fowl |                                                             | E: 25 (36.23)<br>S: 0 (0.0)                | E: 39 (38.61)<br>S: 22 (21.78)              |                                                 | E: 0.9                                                            | E: 0.5             | E: 1.7             | E: 0.75              | E: -0.06           | E: -0.02            |
| General farm management: Internal biosecurity                                                                         |                                                             |                                            |                                             |                                                 |                                                                   |                    |                    |                      |                    |                     |
| Is it possible to clean<br>boots and hands<br>before leaving each<br>stable of the farm?                              | No                                                          | N: 20 (90.91)                              | N: 142 (88.20)                              | N: 171 (93.44)                                  |                                                                   |                    |                    |                      |                    |                     |
|                                                                                                                       |                                                             | E: 64 (92.75)                              | E: 90 (89.11)                               | E: 167 (98.24)                                  |                                                                   |                    |                    |                      |                    |                     |
|                                                                                                                       |                                                             | S: 2 (66.67)                               | S: 45 (44.55)                               | S: 103 (99.04)                                  |                                                                   |                    |                    |                      |                    |                     |
|                                                                                                                       | Yes <sup>1</sup>                                            | N: 1 (4.55)<br>E: 4 (5.80)<br>S: 1 (33.33) | N: 8 (4.97)<br>E: 9 (8.91)<br>S: 55 (54.46) |                                                 | N: 1.13<br>E: 1.6                                                 | N: 0.13<br>E: 0.47 | N: 9.49<br>E: 5.42 | N: 0.91<br>E: 0.45   | N: 0.10<br>E: 0.26 | N: 0.10<br>E: 0.24  |
| Fecal contamination<br>of the lying areas                                                                             | Clean or single<br>excrements on<br>lying area <sup>1</sup> | N: 5 (22.73)                               | N: 44 (27.33)                               | N: 180 (98.36)                                  |                                                                   |                    |                    | N: 0.57 <sup>a</sup> |                    |                     |
|                                                                                                                       |                                                             | E: 20 (28.99)                              | E: 38 (37.62)                               | E: 168 (98.82)                                  |                                                                   |                    |                    | E: 0.38 <sup>a</sup> |                    |                     |
|                                                                                                                       |                                                             | S: 2 (66.67)                               | S: 29 (28.71)                               | S: 102 (98.08)                                  |                                                                   |                    |                    |                      |                    |                     |
|                                                                                                                       | <50%                                                        | N: 16 (72.73)                              | N: 98 (60.87)                               |                                                 | N: 1.44                                                           | N: 0.5             | N: 4.17            | N: 0.29              | N: 0.27            | N: 0.21             |
|                                                                                                                       |                                                             | E: 47 (68.12)                              | E: 54 (53.47)                               |                                                 | E: 1.65                                                           | E: 0.85            | E: 3.23            | E: 0.96              | E: 0.26            | E: 0.18             |
|                                                                                                                       |                                                             | S: 1 (33.33)                               | S: 61 (60.40)                               |                                                 |                                                                   |                    |                    |                      |                    |                     |
|                                                                                                                       | >50%, but<br>surface still<br>visible                       | N: 1 (4.55)                                | N: 16 (9.94)                                |                                                 | N: 0.55                                                           | N: 0.06            | N: 5.07            | N: 0.47              | N: -0.73           | N: -0.12            |
|                                                                                                                       |                                                             | E: 2 (2.90)                                | E: 6 (5.94)                                 |                                                 | E: 0.63                                                           | E: 0.12            | E: 3.43            | E: 0.98              | E: -0.38           | E: -0.03            |
|                                                                                                                       |                                                             | S: 0 (0.0)                                 | S: 8 (7.92)                                 |                                                 |                                                                   |                    |                    |                      |                    |                     |
| Fecal contamination<br>of the walkways                                                                                | Completely<br>covered with<br>feces                         | N: 0 (0.0)                                 | N: 0 (0.0)                                  |                                                 | N, E: No logistic regression possible due to<br>missing variation |                    |                    |                      | N: n.p.<br>E: n.p. | N: 0.00<br>E: -0.02 |
|                                                                                                                       |                                                             | E: 0 (0.0)                                 | E: 1 (0.99)                                 |                                                 |                                                                   |                    |                    |                      |                    |                     |
|                                                                                                                       |                                                             | S: 0 (0.0)                                 | S: 1 (0.99)                                 |                                                 |                                                                   |                    |                    |                      |                    |                     |
|                                                                                                                       | Clean or single<br>excrements on<br>walk way <sup>1</sup>   | N: 3 (13.64)                               | N: 21 (13.04)                               | N: 175 (95.63)                                  |                                                                   |                    |                    | N: 0.95 <sup>a</sup> |                    |                     |
|                                                                                                                       |                                                             | E: 11 (15.94)                              | E: 12 (11.88)                               | E: 158 (92.94)                                  |                                                                   |                    |                    | E: 0.14 <sup>a</sup> |                    |                     |
|                                                                                                                       |                                                             | S: 1 (33.33)                               | S: 6 (5.94)                                 | S: 89 (85.58)                                   |                                                                   |                    |                    |                      |                    |                     |
|                                                                                                                       | <50%                                                        | N: 13 (59.09)                              | N: 97 (60.25)                               |                                                 | N: 0.94                                                           | N: 0.25            | N: 3.59            | N: 0.98              | N: -0.06           | N: -0.05            |
|                                                                                                                       |                                                             | E: 47 (68.12)                              | E: 53 (52.48)                               |                                                 | E: 0.97                                                           | E: 0.39            | E: 2.4             | E: 0.93              | E: -0.02           | E: -0.01            |

| Variable                                                                   | Category                                                  | MAP-<br>positive<br>herds<br>n (%)            | MAP-<br>negative<br>herds<br>n (%)              | Herds with<br>information<br>available<br>n (%) | OR                                                                   | LCL                  | UCL                   | p                                            | AFe                  | AFp                  |
|----------------------------------------------------------------------------|-----------------------------------------------------------|-----------------------------------------------|-------------------------------------------------|-------------------------------------------------|----------------------------------------------------------------------|----------------------|-----------------------|----------------------------------------------|----------------------|----------------------|
|                                                                            |                                                           | S: 2 (66.67)                                  | S: 47 (46.53)                                   |                                                 |                                                                      |                      |                       |                                              |                      |                      |
|                                                                            | >50%,<br>surface<br>visible                               | but<br>still<br>S: 0 (0.0)                    | N: 6 (27.27)<br>E: 8 (11.59)<br>S: 33 (32.67)   | N: 33 (20.50)<br>E: 24 (23.76)<br>S: 33 (32.67) | N: 1.27<br>E: 0.36                                                   | N: 0.29<br>E: 0.12   | N: 5.65<br>E: 1.14    | N: 0.97<br>E: 0.04                           | N: 0.19<br>E: -0.91  | N: 0.13<br>E: -0.38  |
|                                                                            | Completely<br>covered<br>feces                            | with<br>S: 0 (0.0)                            | N: 0 (0.0)<br>E: 2 (2.90)<br>S: 0 (0.0)         | N: 2 (1.24)<br>E: 1 (0.99)<br>S: 0 (0.0)        | N: <0.001<br>E: 2.18                                                 | N: <0.001<br>E: 0.17 | N: >999.9<br>E: 27.56 | N: 0.97<br>E: 0.36                           | N: n.p.<br>E: 0.28   | N: -0.08<br>E: 0.04  |
| Calf management: Calving                                                   |                                                           |                                               |                                                 |                                                 |                                                                      |                      |                       |                                              |                      |                      |
| Where did the most<br>calvings take place<br>within the last 12<br>months? | Calving only<br>in individual<br>calving pen <sup>1</sup> | N: 6 (27.27)<br>E: 10 (14.49)<br>S: 1 (33.33) | N: 40 (24.84)<br>E: 13 (12.87)<br>S: 11 (10.89) | N: 183 (100)<br>E: 170 (100)<br>S: 104 (100)    |                                                                      |                      |                       | N: 0.98 <sup>a</sup><br>E: 0.96 <sup>a</sup> |                      |                      |
|                                                                            | Calving only<br>in common<br>stabling                     | N: 2 (9.09)<br>E: 3 (4.35)<br>S: 0 (0.0)      | N: 8 (4.97)<br>E: 6 (5.94)<br>S: 46 (45.54)     |                                                 | N: 1.67<br>E: 0.65                                                   | N: 0.28<br>E: 0.13   | N: 9.8<br>E: 3.26     | N: 0.96<br>E: 0.97                           | N: 0.35<br>E: -0.30  | N: 0.09<br>E: -0.07  |
|                                                                            | Calving only<br>in group<br>calving pen                   | N: 8 (36.36)<br>E: 48 (69.57)<br>S: 2 (66.67) | N: 59 (36.65)<br>E: 63 (62.38)<br>S: 16 (15.84) |                                                 | N: 0.9<br>E: 0.99                                                    | N: 0.29<br>E: 0.4    | N: 2.8<br>E: 2.45     | N: 0.97<br>E: 0.97                           | N: -0.09<br>E: -0.01 | N: -0.05<br>E: 0.00  |
|                                                                            | Calving only<br>in pen used for<br>sick animals           | N: 3 (13.64)<br>E: 2 (2.9)<br>S: 0 (0.0)      | N: 28 (17.39)<br>E: 2 (1.98)<br>S: 14 813.86)   |                                                 | N: 0.71<br>E: 1.3                                                    | N: 0.17<br>E: 0.16   | N: 3.1<br>E: 10.9     | N: 0.97<br>E: 0.96                           | N: -0.35<br>E: 0.13  | N: -0.12<br>E: 0.02  |
|                                                                            | Calving only<br>on pasture                                | N: 0 (0.0)<br>E: 0 (0.0)<br>S: 0 (0.0)        | N: 8 (4.97)<br>E: 5 (4.95)<br>S: 1 (0.99)       |                                                 | N, E: No logistic regression<br>possible due to missing<br>variation |                      |                       |                                              | N: n.p.<br>E: n.p.   | N: -0.17<br>E: -0.22 |
|                                                                            | Calving only<br>in another area                           | N: 0 (0.0)<br>E: 0 (0.0)<br>S: 0 (0.0)        | N: 0 (0.0)<br>E: 0 (0.0)<br>S: 5 (4.95)         |                                                 | N, E: No logistic regression<br>possible due to missing<br>variation |                      |                       |                                              | N: n.p.<br>E: n.p.   | N: 0.00<br>E: 0.00   |
|                                                                            | Calving in<br>combination of<br>above areas               | N: 3 (13.64)<br>E: 6 (8.70)<br>S: 0 (0.0)     | N: 18 (11.18)<br>E: 12 (11.88)<br>S: 8 (7.92)   |                                                 | N: 1.11<br>E: 0.65                                                   | N: 0.25<br>E: 0.18   | N: 4.95<br>E: 2.34    | N: 0.96<br>E: 0.97                           | N: 0.09<br>E: -0.30  | N: 0.03<br>E: -0.11  |

| Variable                                                                                    | Category                                                   | MAP-<br>positive<br>herds<br>n (%)              | MAP-<br>negative<br>herds<br>n (%)                | Herds with<br>information<br>available<br>n (%)    | OR                                                             | LCL                  | UCL                   | p                                            | AF <sub>e</sub>      | AF <sub>p</sub>      |
|---------------------------------------------------------------------------------------------|------------------------------------------------------------|-------------------------------------------------|---------------------------------------------------|----------------------------------------------------|----------------------------------------------------------------|----------------------|-----------------------|----------------------------------------------|----------------------|----------------------|
| Does the calf always stay with the mother for a certain time after birth? (suckling calves) | No <sup>1</sup>                                            | N: 10 (45.45)<br>E: 38 (55.07)<br>S: 2 (66.67)  | N: 67 (41.61)<br>E: 42 (41.58)<br>S: 69 (68.32)   | N: 183 (100)<br>E: 168 (98.82)<br>S: 104 (100)     |                                                                |                      |                       |                                              |                      |                      |
|                                                                                             | Yes                                                        | N: 12 (54.54)<br>E: 30 (43.48)<br>S: 1 (33.33)  | N: 94 (58.38)<br>E: 58 (57.42)<br>S: 32 (31.68)   |                                                    | N: 0.86<br>E: 0.57                                             | N: 0.35<br>E: 0.31   | N: 2.1<br>E: 1.07     | N: 0.73<br>E: 0.08                           | N: -0.15<br>E: -0.39 | N: -0.08<br>E: -0.17 |
| Calf management: Calf housing                                                               |                                                            |                                                 |                                                   |                                                    |                                                                |                      |                       |                                              |                      |                      |
| Which hygiene measures are conducted before stabling new calves?                            | Hygiene measures with low risk of infection <sup>1</sup> † | N: 21 (95.45)<br>E: 66 (95.65)<br>S: 3 (100.00) | N: 125 (77.64)<br>E: 89 (88.12)<br>S: 92 (91.09)  | N: 163 (89.07)<br>E: 159 (93.53)<br>S: 101 (97.12) |                                                                |                      |                       | N: 0.99 <sup>a</sup><br>E: 0.77 <sup>a</sup> |                      |                      |
|                                                                                             | Hygiene measures with high risk of infection ‡             | N: 0 (0.0)<br>E: 2 (2.9)<br>S: 0 (0.0)          | N: 11 (6.83)<br>E: 2 (1.98)<br>S: 5 (4.95)        |                                                    | N: <0.001<br>E: 1.35                                           | N: <0.001<br>E: 0.19 | N: >999.9<br>E: 9.82  | N: 0.98<br>E: 0.77                           | N: n.p.<br>E: 0.15   | N: -0.08<br>E: 0.00  |
|                                                                                             | Other hygiene measures                                     | N: 0 (0.0)<br>E: 0 (0.0)<br>S: 0 (0.0)          | N: 6 (3.73)<br>E: 0 (0.0)<br>S: 1 (0.99)          |                                                    | N, E: No logistic regression possible due to missing variation |                      |                       |                                              | N: n.p.<br>E: n.p.   | N: -0.04<br>E: 0.00  |
| Are calves up to two weeks housed in group housing?                                         | No <sup>1</sup>                                            | N: 21 (95.45)<br>E: 63 (91.30)<br>S: 3 (100)    | N: 151 (93.79)<br>E: 84 (83.17)<br>S: 100 (99.01) | N: 183 (100)<br>E: 170 (100)<br>S: 104 (100)       |                                                                |                      |                       |                                              |                      |                      |
|                                                                                             | Yes                                                        | N: 1 (4.55)<br>E: 6 (8.70)<br>S: 0 (0.0)        | N: 10 (6.21)<br>E: 17 (16.83)<br>S: 1 (0.99)      |                                                    | N: 0.72<br>E: 0.47                                             | N: 0.09<br>E: 0.18   | N: 5.91<br>E: 1.26    | N: 0.76<br>E: 0.13                           | N: -0.34<br>E: -0.64 | N: -0.02<br>E: -0.06 |
| Are calves from three weeks on housed in group housing?                                     | No <sup>1</sup>                                            | N: 0 (0.0)<br>E: 1 (1.45)<br>S: 0 (0.0)         | N: 3 (1.86)<br>E: 3 (2.97)<br>S: 8 (7.92)         | N: 178 (97.27)<br>E: 168 (98.82)<br>S: 103 (99.04) |                                                                |                      |                       |                                              |                      |                      |
|                                                                                             | Yes                                                        | N: 20 (90.91)<br>E: 68 (98.55)<br>S: 3 (100)    | N: 155 (96.27)<br>E: 96 (95.05)<br>S: 92 (91.09)  |                                                    | N: >999.9<br>E: 2.13                                           | N: <0.001<br>E: 0.22 | N: >999.9<br>E: 20.87 | N: 0.99<br>E: 0.52                           | N: 1.00<br>E: 0.40   | N: 1.00<br>E: 0.39   |

| Variable                                                                                           | Category                                              | MAP-<br>positive<br>herds<br>n (%) | MAP-<br>negative<br>herds<br>n (%) | Herds with<br>information<br>available<br>n (%) | OR      | LCL     | UCL      | p                    | AFe      | AFp      |
|----------------------------------------------------------------------------------------------------|-------------------------------------------------------|------------------------------------|------------------------------------|-------------------------------------------------|---------|---------|----------|----------------------|----------|----------|
| Do the calves* <sup>2</sup> have contact with other calves if housing in an individual calf igloo? | No <sup>1</sup>                                       | N: 5 (22.73)                       | N: 21 (13.04)                      | N: 77 (42.08)                                   |         |         |          |                      |          |          |
|                                                                                                    |                                                       | E: 12 (17.39)                      | E: 17 (16.83)                      | E: 87 (51.18)                                   |         |         |          |                      |          |          |
|                                                                                                    |                                                       | S: 1 (33.33)                       | S: 9 (8.91)                        | S: 24 (23.08)                                   |         |         |          |                      |          |          |
|                                                                                                    | Yes                                                   | N: 7 (31.82)                       | N: 44 (27.33)                      |                                                 | N: 0.67 | N: 0.19 | N: 2.36  | N: 0.53              | N: -0.40 | N: -0.23 |
|                                                                                                    |                                                       | E: 31 (44.93)                      | E: 27 (26.73)                      |                                                 | E: 1.63 | E: 0.66 | E: 4.01  | E: 0.29              | E: 0.23  | E: 0.16  |
|                                                                                                    |                                                       | S: 0 (0.0)                         | S: 14 (13.86)                      |                                                 |         |         |          |                      |          |          |
| Fecal contamination of the lying areas                                                             | Clean or single excrements on lying area <sup>1</sup> | N: 16 (72.73)                      | N: 110 (68.32)                     | N: 176 (96.17)                                  |         |         |          | N: 0.85 <sup>a</sup> |          |          |
|                                                                                                    |                                                       | E: 41 (59.42)                      | E: 67 (66.34)                      | E: 166 (97.65)                                  |         |         |          | E: 0.44 <sup>a</sup> |          |          |
|                                                                                                    |                                                       | S: 3 (100)                         | S: 73 (72.38)                      | S: 100 (96.15)                                  |         |         |          |                      |          |          |
|                                                                                                    | <50%                                                  | N: 5 (22.73)                       | N: 40 (24.84)                      |                                                 | N: 0.86 | N: 0.3  | N: 2.5   | N: 0.57              | N: -0.14 | N: -0.03 |
|                                                                                                    |                                                       | E: 25 (36.23)                      | E: 27 (26.73)                      |                                                 | E: 1.51 | E: 0.78 | E: 2.95  | E: 0.74              | E: 0.21  | E: 0.08  |
|                                                                                                    |                                                       | S: 0 (0)                           | S: 22 (21.78)                      |                                                 |         |         |          |                      |          |          |
|                                                                                                    | >50%, but surface still visible                       | N: 1 (4.55)                        | N: 4 (2.48)                        |                                                 | N: 1.72 | N: 0.18 | N: 16.36 | N: 0.59              | N: 0.37  | N: 0.02  |
|                                                                                                    |                                                       | E: 3 (4.35)                        | E: 3 (2.97)                        |                                                 | E: 1.63 | E: 0.32 | E: 8.48  | E: 0.73              | E: 0.24  | E: 0.02  |
|                                                                                                    |                                                       | S: 0 (0)                           | S: 2 (1.98)                        |                                                 |         |         |          |                      |          |          |
| Do you practice calf rearing in addition to dairy cow farming on the farm?                         | Only rearing own calves <sup>1</sup>                  | N: 19 (86.36)                      | N: 140 (86.96)                     | N: 183 (100)                                    |         |         |          | N: 0.24 <sup>a</sup> |          |          |
|                                                                                                    |                                                       | E: 63 (91.30)                      | E: 99 (98.02)                      | E: 170 (100)                                    |         |         |          | E: 0.17 <sup>a</sup> |          |          |
|                                                                                                    |                                                       | S: 3 (100)                         | S: 96 (95.05)                      | S: 104 (100)                                    |         |         |          |                      |          |          |
|                                                                                                    | Rearing own calves and calves from other farms        | N: 1 (4.55)                        | N: 17 (10.56)                      |                                                 | N: 0.43 | N: 0.06 | N: 3.45  | N: 0.19              | N: -1.15 | N: -0.06 |
|                                                                                                    |                                                       | E: 5 (7.25)                        | E: 1 (0.99)                        |                                                 | E: 7.86 | E: 0.9  | E: 68.82 | E: 0.16              | E: 0.53  | E: 0.04  |
|                                                                                                    |                                                       | S: 0 (0.0)                         | S: 3 (2.97)                        |                                                 |         |         |          |                      |          |          |
|                                                                                                    | No calf rearing                                       | N: 2 (9.09)                        | N: 4 (2.48)                        |                                                 | N: 3.69 | N: 0.63 | N: 21.5  | N: 0.09              | N: 0.64  | N: 0.06  |
|                                                                                                    |                                                       | E: 1 (1.45)                        | E: 1 (0.99)                        |                                                 | E: 1.57 | E: 0.1  | E: 25.58 | E: 0.70              | E: 0.22  | E: 0.00  |
|                                                                                                    |                                                       | S: 0 (0.0)                         | S: 2 (1.98)                        |                                                 |         |         |          |                      |          |          |
| Calf management: Calf feeding                                                                      |                                                       |                                    |                                    |                                                 |         |         |          |                      |          |          |
| Do you pasteurize milk before feeding?                                                             | Yes <sup>1</sup>                                      | N: 2 (9.09)                        | N: 4 (2.48)                        | N: 178 (97.27)                                  |         |         |          |                      |          |          |
|                                                                                                    |                                                       | E: 12 (17.39)                      | E: 10 (9.90)                       | E: 166 (97.65)                                  |         |         |          |                      |          |          |
|                                                                                                    |                                                       | S: 0 (0.0)                         | S: 0 (0.0)                         | S: 103 (99.04)                                  |         |         |          |                      |          |          |

| Variable                                                                                           | Category                            | MAP-<br>positive<br>herds<br>n (%)             | MAP-<br>negative<br>herds<br>n (%)                | Herds with<br>information<br>available<br>n (%) | OR                   | LCL                  | UCL                  | p                                            | AFe                  | AFp                  |
|----------------------------------------------------------------------------------------------------|-------------------------------------|------------------------------------------------|---------------------------------------------------|-------------------------------------------------|----------------------|----------------------|----------------------|----------------------------------------------|----------------------|----------------------|
|                                                                                                    | No                                  | N: 20 (90.91)<br>E: 57 (82.61)<br>S: 3 (100)   | N: 152 (94.41)<br>E: 87 (86.14)<br>S: 100 (99.01) |                                                 | N: 0.26<br>E: 0.55   | N: 0.05<br>E: 0.22   | N: 1.53<br>E: 1.35   | N: 0.14<br>E: 0.19                           | N: -1.87<br>E: -0.38 | N: -1.70<br>E: -0.31 |
| What do you feed your calves during the first two weeks of life?                                   | Milk replacer <sup>1</sup>          | N: 4 (18.18)<br>E: 12 (17.39)<br>S: 0 (0.0)    | N: 36 (22.36)<br>E: 18 (17.82)<br>S: 5 (4.95)     | N: 182 (99.45)<br>E: 170 (100)<br>S: 104 (100)  |                      |                      |                      | N: 0.84 <sup>a</sup><br>E: 0.96 <sup>a</sup> |                      |                      |
|                                                                                                    | Milk                                | N: 12 (54.55)<br>E: 42 (60.87)<br>S: 2 (66.67) | N: 88 (54.66)<br>E: 63 (62.38)<br>S: 71 (70.30)   |                                                 | N: 1.23<br>E: 1.0    | N: 0.37<br>E: 0.44   | N: 4.06<br>E: 2.29   | N: 1.0<br>E: 0.86                            | N: 0.17<br>E: 0.00   | N: 0.13<br>E: 0.00   |
|                                                                                                    | Other                               | N: 6 (27.27)<br>E: 15 (21.74)<br>S: 1 (33.33)  | N: 36 (22.36)<br>E: 20 (19.80)<br>S: 25 (24.75)   |                                                 | N: 1.5<br>E: 1.13    | N: 0.39<br>E: 0.42   | N: 5.77<br>E: 3.03   | N: 0.57<br>E: 0.77                           | N: 0.30<br>E: 0.07   | N: 0.18<br>E: 0.04   |
| What do you feed your calves from three weeks on?                                                  | Milk replacer <sup>1</sup>          | N: 11 (50.00)<br>E: 43 (62.32)<br>S: 0 (0.0)   | N: 96 (59.63)<br>E: 61 (60.40)<br>S: 23 (22.77)   | N: 183 (100)<br>E: 170 (100)<br>S: 104 (100)    |                      |                      |                      | N: 0.29 <sup>a</sup><br>E: 0.86 <sup>a</sup> |                      |                      |
|                                                                                                    | Milk                                | N: 4 (18.18)<br>E: 21 (30.43)<br>S: 2 (66.67)  | N: 35 (21.74)<br>E: 27 (26.73)<br>S: 55 (54.46)   |                                                 | N: 1.0<br>E: 1.1     | N: 0.3<br>E: 0.55    | N: 3.34<br>E: 2.2    | N: 0.24<br>E: 0.95                           | N: 0.00<br>E: 0.05   | N: 0.00<br>E: 0.02   |
|                                                                                                    | Other                               | N: 5 (22.73)<br>E: 5 (7.25)<br>S: 1 (33.33)    | N: 27 (16.77)<br>E: 11 (10.89)<br>S: 23 (22.77)   |                                                 | N: 1.62<br>E: 0.65   | N: 0.52<br>E: 0.21   | N: 5.05<br>E: 1.99   | N: 0.86<br>E: 0.96                           | N: 0.34<br>E: -0.32  | N: 0.11<br>E: -0.03  |
|                                                                                                    | Is fed by the cow (suckling calves) | N: 2 (9.09)<br>E: 0 (0.0)<br>S: 0 (0.0)        | N: 3 (1.86)<br>E: 2 (1.98)<br>S: 0 (0.0)          |                                                 | N: 5.82<br>E: <0.001 | N: 0.88<br>E: <0.001 | N: 38.7<br>E: >999.9 | N: 0.09<br>E: 0.96                           | N: 0.74<br>E: n.p.   | N: 0.11<br>E: -0.02  |
| In case of bucket drinking: Does each calf have its own bucket during the first two weeks of life? | Yes <sup>1</sup>                    | N: 16 (72.73)<br>E: 46 (66.67)<br>S: 3 (100)   | N: 90 (55.90)<br>E: 56 (55.45)<br>S: 47 (46.53)   | N: 177<br>E: 160<br>S: 99                       |                      |                      |                      |                                              |                      |                      |
|                                                                                                    | No                                  | N: 5 (22.73)<br>E: 18 (26.09)<br>S: 0 (0)      | N: 66 (40.99)<br>E: 34 (33.66)<br>S: 49 (48.51)   |                                                 | N: 0.43<br>E: 0.65   | N: 0.15<br>E: 0.32   | N: 1.22<br>E: 1.29   | N: 0.11<br>E: 0.21                           | N: -1.14<br>E: -0.30 | N: -0.27<br>E: -0.09 |



| Variable                                                                                                                  | Category                         | MAP-<br>positive<br>herds<br>n (%) | MAP-<br>negative<br>herds<br>n (%) | Herds with<br>information<br>available<br>n (%) | OR                 | LCL                | UCL                 | p                                            | AFe                | AFp                |
|---------------------------------------------------------------------------------------------------------------------------|----------------------------------|------------------------------------|------------------------------------|-------------------------------------------------|--------------------|--------------------|---------------------|----------------------------------------------|--------------------|--------------------|
| In case of bucket drinking: Does each calf from three weeks on have its own bucket?                                       | Yes <sup>1</sup>                 | N: 2 (9.09)                        | N: 16 (9.94)                       | N: 105<br>E: 58<br>S: 88                        |                    |                    |                     |                                              |                    |                    |
|                                                                                                                           |                                  | E: 9 (13.04)                       | E: 13 (12.87)                      |                                                 |                    |                    |                     |                                              |                    |                    |
|                                                                                                                           |                                  | S: 2 (66.67)                       | S: 27 (26.73)                      |                                                 |                    |                    |                     |                                              |                    |                    |
|                                                                                                                           | No                               | N: 10 (45.45)                      | N: 77 (47.83)                      |                                                 | N: 1.04<br>E: 1.44 | N: 0.21<br>E: 0.49 | N: 5.2<br>E: 4.22   | N: 0.96<br>E: 0.5                            | N: 0.03<br>E: 0.18 | N: 0.03<br>E: 0.12 |
|                                                                                                                           |                                  | E: 18 (26.09)                      | E: 18 (17.82)                      |                                                 |                    |                    |                     |                                              |                    |                    |
|                                                                                                                           |                                  | S: 0 (0)                           | S: 59 (58.42)                      |                                                 |                    |                    |                     |                                              |                    |                    |
| In case of bucket drinking/automatic feeding: How often are the buckets and teats cleaned for calves up to two weeks?     | After every feeding <sup>1</sup> | N: 7 (31.82)                       | N: 93 (57.76)                      | N: 175<br>E: 162<br>S: 102                      |                    |                    |                     | N: 0.11 <sup>a</sup><br>E: 0.13 <sup>a</sup> |                    |                    |
|                                                                                                                           |                                  | E: 27 (39.13)                      | E: 57 (56.44)                      |                                                 |                    |                    |                     |                                              |                    |                    |
|                                                                                                                           |                                  | S: 1 (33.33)                       | S: 83 (82.18)                      |                                                 |                    |                    |                     |                                              |                    |                    |
|                                                                                                                           | Once a day                       | N: 7 (31.82)                       | N: 23 (14.29)                      |                                                 | N: 4.04<br>E: 2.24 | N: 1.29<br>E: 0.99 | N: 12.68<br>E: 5.1  | N: 0.17<br>E: 0.37                           | N: 0.70<br>E: 0.38 | N: 0.35<br>E: 0.15 |
|                                                                                                                           |                                  | E: 17 (24.64)                      | E: 16 (15.84)                      |                                                 |                    |                    |                     |                                              |                    |                    |
|                                                                                                                           |                                  | S: 1 (33.33)                       | S: 7 (6.93)                        |                                                 |                    |                    |                     |                                              |                    |                    |
|                                                                                                                           | Less than once a day             | N: 6 (27.27)                       | N: 32 (19.88)                      |                                                 | N: 2.49<br>E: 2.26 | N: 0.78<br>E: 0.96 | N: 7.96<br>E: 5.35  | N: 0.76<br>E: 0.37                           | N: 0.56<br>E: 0.38 | N: 0.26<br>E: 0.14 |
|                                                                                                                           |                                  | E: 15 (21.74)                      | E: 14 (13.86)                      |                                                 |                    |                    |                     |                                              |                    |                    |
|                                                                                                                           |                                  | S: 1 (33.33)                       | S: 6 (5.94)                        |                                                 |                    |                    |                     |                                              |                    |                    |
|                                                                                                                           | No cleaning                      | N: 1 (4.55)                        | N: 6 (3.73)                        |                                                 | N: 2.2<br>E: 1.64  | N: 0.23<br>E: 0.55 | N: 21.05<br>E: 4.88 | N: 0.98<br>E: 0.93                           | N: 0.51<br>E: 0.27 | N: 0.06<br>E: 0.05 |
|                                                                                                                           |                                  | E: 7 (10.14)                       | E: 9 (8.91)                        |                                                 |                    |                    |                     |                                              |                    |                    |
|                                                                                                                           |                                  | S: 0 (0.0)                         | S: 3 (2.97)                        |                                                 |                    |                    |                     |                                              |                    |                    |
| In case of bucket drinking/automatic feeding: How often are the buckets and teats cleaned for calves from three weeks on? | After every feeding <sup>1</sup> | N: 3 (13.64)                       | N: 51 (31.68)                      | N: 137<br>E: 143<br>S: 100                      |                    |                    |                     | N: 0.22 <sup>a</sup><br>E: 0.06 <sup>a</sup> |                    |                    |
|                                                                                                                           |                                  | E: 10 (14.49)                      | E: 29 (28.71)                      |                                                 |                    |                    |                     |                                              |                    |                    |
|                                                                                                                           |                                  | S: 0 (0.0)                         | S: 73 (72.28)                      |                                                 |                    |                    |                     |                                              |                    |                    |
|                                                                                                                           | Once a day                       | N: 7 (31.82)                       | N: 26 (16.15)                      |                                                 | N: 4.58<br>E: 3.51 | N: 1.09<br>E: 1.37 | N: 19.17<br>E: 9.0  | N: 0.15<br>E: 0.06                           | N: 0.74<br>E: 0.53 | N: 0.52<br>E: 0.37 |
|                                                                                                                           |                                  | E: 23 (33.33)                      | E: 19 (18.81)                      |                                                 |                    |                    |                     |                                              |                    |                    |
|                                                                                                                           |                                  | S: 2 (66.67)                       | S: 7 (6.93)                        |                                                 |                    |                    |                     |                                              |                    |                    |
|                                                                                                                           | Less than once a day             | N: 5 (22.73)                       | N: 33 (20.50)                      |                                                 | N: 2.58<br>E: 2.76 | N: 0.58<br>E: 1.06 | N: 11.50<br>E: 7.16 | N: 0.96<br>E: 0.32                           | N: 0.58<br>E: 0.47 | N: 0.36<br>E: 0.31 |
|                                                                                                                           |                                  | E: 19 (27.54)                      | E: 20 (19.80)                      |                                                 |                    |                    |                     |                                              |                    |                    |
|                                                                                                                           |                                  | S: 1 (33.33)                       | S: 11 (10.89)                      |                                                 |                    |                    |                     |                                              |                    |                    |
|                                                                                                                           | No cleaning                      | N: 2 (9.09)                        | N: 10 (6.21)                       |                                                 | N: 3.4<br>E: 1.86  | N: 0.5<br>E: 0.62  | N: 23.03<br>E: 5.62 | N: 0.63<br>E: 0.78                           | N: 0.67<br>E: 0.34 | N: 0.27<br>E: 0.16 |
|                                                                                                                           |                                  | E: 9 (13.04)                       | E: 14 (13.86)                      |                                                 |                    |                    |                     |                                              |                    |                    |
|                                                                                                                           |                                  | S: 0 (0.0)                         | S: 6 (5.94)                        |                                                 |                    |                    |                     |                                              |                    |                    |

<sup>1</sup>= Reference category

N= Study region north

E= Study region east

S= Study region south

OR= Odds Ratio

LCL= Lower Confidence Limit

UCL= Upper Confidence Limit

<sup>a</sup>= global p-value

AF<sub>e</sub>= Attributable fraction exposed

AF<sub>p</sub>= Population attributable fraction

n.p.= calculation not possible

\*<sub>1</sub> includes at least weaned or six-month-old cattle (until first calving)

\*<sub>2</sub>calves up to two weeks

† includes only cleaning of calf pens; movement of calf pens, cleaning of calf pens, keeping calf pens empty, disinfection of calf pens, other (in combination and as not mentioned below)

‡ includes: only movement of calf pens, only keeping calf pens empty, only disinfection of calf pens, only keeping calf pens empty and movement of calf pens, only disinfection and keeping calf pens empty, only movement of calf pens and keeping calf pens empty and disinfected
